# Supplementary material for: Eye gaze differences in school scenes between preschool children and adolescents with high-functioning autism spectrum disorder and those with typical development
Source: Research Square preprint supplement (doi:10.21203/rs.3.rs-41707/v5), 2020-12-03
Supplement: Supplementary file 1 [file 28ed750925f3df5eab3bf1ae.docx]

**Table 1.** Comparison of eye gaze duration on human facial features and objects by children with ASD or TD

　 A smiling human face A classroom scene in a high school

Eyes Mouth Face Finger Pointed-at object

Preschool Children

TD (n = 24) 1.18 ± 0.14 0.53 ± 0.10 TD (n = 25) 1.06 ± 0.19 0.16 ± 0.05 1.00 ± 0.13

ASD (n = 10) 0.44 ± 0.21 0.31 ± 0.16 ASD (n = 11) 0.78 ± 0.29 0.11 ± 0.06 0.55 ± 0.20

Adolescents

TD (n = 23) 0.92 ± 0.14 0.39 ± 0.10 TD (n = 24) 0.70 ± 0.20 0.21 ± 0.04 0.97 ± 0.14

ASD (n = 18) 0.71 ± 0.16 0.31 ± 0.12 ASD (n = 18) 1.01 ± 0.23 0.10 ± 0.05 0.58 ± 0.16

Welch’s t-test

Preschool t (31) = 11.7 t (16) = 1.31 t (18) = .83 t (25) = .45 t (21) = 4.83

ASD vs TD p = .002 p = .269 p = .374 p = .507 p = .039

Adolescents t (39) = 1.42 t (34) = .30 t (21) = .73 t (35) = 5.21 t (39) = 3.20

ASD vs TD p = .241 p = .589 p =. 402 p =. 029 p =. 081

Data are presented as mean ± standard deviation of the number of seconds.

ASD, autistic spectrum disorder; TD, typical development.
