# Supplementary material for: Eye gaze differences in school scenes between preschool children and adolescents with high-functioning autism spectrum disorder and those with typical development
Source: Research Square preprint supplement (doi:10.21203/rs.3.rs-41707/v5), 2020-12-03
Supplement: Supplementary file 2 [file 429cf7c18a06bbe93443675b.xlsx]

## Sheet: classroom
group	age	face	finger	pointed object	left wall	upper wall
1	1	1.164	0.012	0.544	0	0.006
1	1	0	0	0.006	0.002	0.032
1	1	0.006	0.438	0.038	0.002	0.116
1	1	0.18	0.06	0.084	0	0.13
1	1	1.692	0.014	0.202	0	0.652
1	1	0.06	0.03	0.848	0	0.596
1	1	0.84	0.046	1.894	0	0
1	1	2.296	0.554	0.672	0	0.048
1	1	0	0	0.766	0	0.224
1	1	2.06	0.01	0.78	0	0.034
1	1	0.252	0.02	0.246	0.026	0.306
2	1	0.022	1.164	1.27	0	0
2	1	1.104	0.012	1.49	0	0.004
2	1	0.58	0.594	0.5	0	0.002
2	1	1.91	0.022	1.26	0	0.022
2	1	2.532	0.378	0.722	0	0.002
2	1	0	0	0.442	0	0.438
2	1	0	0.002	0	0.076	0.028
2	1	0.03	0	0.006	0.006	0.556
2	1	2.676	0.012	0.952	0	0.002
2	1	1.608	0.096	1.972	0	0.106
2	1	0.716	0.028	1.48	0.004	0.982
2	1	0.178	0.028	1.838	0	0.064
2	1	0.366	0.19	0.44	0.212	0
2	1	1.286	0.008	1.022	0	0
2	1	0.678	0.13	2.054	0	0.08
2	1	1.024	0.032	1.552	0.002	0.348
2	1	1.792	0.106	0.446	0.006	0.166
2	1	0.65	0.216	0.504	0	0
2	1	1.748	0.008	0.532	0	0.234
2	1	0.768	0.096	0.494	0.03	0.062
2	1	2.196	0.148	1.086	0	0
2	1	1.31	0.152	0.62	0	0
2	1	1.998	0.096	1.06	0	0.036
2	1	0.736	0.136	1.892	0	0.006
2	1	0.666	0.342	1.422	0	0.156
1	2	0.012	0.192	0.148	0	0
1	2	0.628	0.032	0.274	0.04	0.334
1	2	0.056	0.174	0.732	0.298	0
1	2	1.534	0.278	0.502	0	0.488
1	2	0.006	0.324	0.23	0	0.732
1	2	0.142	0.122	0.422	0	0
1	2	1.01	0	2.502	0	0.002
1	2	1.298	0.102	1.174	0	0
1	2	0.212	0.22	0.04	0	0.148
1	2	0.056	0.106	0.376	0	0.008
1	2	0.48	0.028	0.266	0	0.228
1	2	5.74	0	0	0	0
1	2	0.888	0	0.8	0	0.166
1	2	0.546	0.104	0.702	0	0.876
1	2	0.876	0.03	0.324	0.008	0.218
1	2	3.688	0.002	0	0	0.008
1	2	0.738	0.014	1.738	0	0.018
1	2	0.3	0.002	0.174	0	0
2	2	0.884	0.21	1.26	0	0.054
2	2	0.846	0.266	0.71	0.01	0.06
2	2	0.192	0.064	0.926	0	0.01
2	2	0.024	0.058	0.692	0.28	0
2	2	0.854	0	0.51	0	0.39
2	2	0.262	0.002	2.404	0	0.002
2	2	0.016	0.682	0.806	0	0
2	2	1.64	0.588	3.366	0	0
2	2	1.452	0	0.426	0	0.002
2	2	1.612	0.026	0.524	0	0.256
2	2	0.328	0.38	1.718	0	0.156
2	2	0.74	0.13	0.23	0.734	0.106
2	2	0.276	0.002	0.732	0.004	0.128
2	2	1.354	0.024	0.272	0	0.466
2	2	0.188	0.094	2.258	0	0.056
2	2	0.004	0.47	0.306	0	0
2	2	0.972	0.436	0.806	0.014	0.054
2	2	0.344	0.372	1.03	0	0.254
2	2	0.878	0.358	0.17	0	0
2	2	0.066	0.058	0.834	0.002	0.622
2	2	0.156	0.256	0.418	0	0.162
2	2	1.958	0.464	0.668	0	0.078
2	2	1.364	0.028	1.31	0	0
2	2	0.356	0.046	0.954	0	0.118
group	age
1= ASD	1= preschool
2= TD	2= adolescent

## Sheet: human face
group	age	face	eyes	right eye	left eye	mouth	background
1	1	3.986	0.078	0	0.006	0.31	0.112
1	1	5.374	0.342	0	0.112	0.638	0.01
1	1	6.308	1.126	0.25	0.006	0.304	0.474
1	1	5.08	0.266	0	0.02	0.072	0.996
1	1	7.144	0.5	0	0.128	0.026	0.014
1	1	6.084	1.05	0.364	0.094	0.01	0.012
1	1	2.41	0.006	0.004	0.002	0	2.426
1	1	2.056	0.01	0.01	0	0	1.078
1	1	2.734	0.252	0.184	0	0	0.008
1	1	6.684	0.734	0.23	0.334	1.694	0.75
2	1	7.406	0.264	0.142	0	0.398	0.018
2	1	7.632	1.43	0.024	0.014	0	0.006
2	1	4.8	0.554	0.004	0.132	0.246	0.244
2	1	7.294	1.434	0.144	0.182	0.236	0.194
2	1	7.19	2.368	0	1.35	0.096	0.012
2	1	7.822	1.494	0.18	0.118	0	0
2	1	1.37	0	0	0	0.16	0.024
2	1	5.184	0.048	0	0.034	0	0.024
2	1	7.408	0.438	0.008	0.038	1.378	0.01
2	1	5.952	1.946	0.048	1.352	1.642	0.18
2	1	6.45	1.676	0.336	1.032	0.166	0.834
2	1	5.272	0.014	0	0.002	0.042	1.168
2	1	7.452	0.756	0.002	0.438	1.224	0
2	1	7.556	1.554	0	0.732	0.992	0.05
2	1	7.482	1.756	0.224	0.168	0.326	0
2	1	7.216	0.84	0.262	0.07	1.236	0.054
2	1	7.46	1.674	0.17	1.166	0.928	0.056
2	1	7.21	2.082	0.37	0.698	0.524	0.19
2	1	4.292	0.432	0.006	0.322	0.33	0.018
2	1	7.556	1.128	0.262	0.234	0.112	0.122
2	1	7.136	1.564	0.048	0.72	0.642	0.152
2	1	5.664	1.516	0.014	0.268	0.35	1.09
2	1	4.672	0.03	0	0.01	0.508	1.488
2	1	7.188	3.242	2.126	0.822	1.2	0.03
1	2	7.146	0.606	0.02	0.092	0	0.018
1	2	7.322	0.414	0.146	0.168	0.408	0.194
1	2	4.224	0.44	0.084	0.088	0.17	1.47
1	2	5.258	0.834	0.004	0.47	0.198	0.1
1	2	5.166	0.924	0.988	0	0	0.964
1	2	6.982	0.454	0	0.314	0.962	0.012
1	2	7.084	0.866	0	0.508	0.654	0.16
1	2	7.572	1.098	0.196	0.54	0.428	0.002
1	2	6.256	0.748	0.004	0.432	0.048	0.234
1	2	3.32	0.158	0	0.012	0.582	2.146
1	2	0.982	0.018	0.006	0	0.25	1.684
1	2	5.51	2.292	0.006	0.582	0	1.18
1	2	7.4	0.718	0	0.24	0	0.12
1	2	7.368	0.196	0.002	0.062	0.194	0.034
1	2	6.488	0.376	0.244	0.076	0.614	0.352
1	2	1.514	0.436	0.002	0.396	0.012	0.652
1	2	6.776	1.386	0.51	0.482	0.386	0.566
1	2	7.092	0.724	0.424	0.01	0.758	0.206
2	2	7.058	0.828	0.636	0.02	0.29	0.612
2	2	6.23	1.086	0.074	0.23	0	0.004
2	2	6.194	0.696	0.206	0.028	0.812	0.502
2	2	5.326	1.394	0.592	0.652	0	0.23
2	2	6.486	0.668	0.106	0.01	0.354	0.004
2	2	7.076	1.406	0.99	0.118	0.178	0.002
2	2	7.216	0.818	0.002	0.17	0.68	0
2	2	6.8	2.964	0.826	1.896	0.07	0.06
2	2	7.572	1.758	0.096	0	0	0
2	2	6.964	0.712	0.136	0.112	0.95	0.18
2	2	7.308	0.3	0.188	0.036	0.646	0.004
2	2	6.55	0.296	0.026	0.012	0.038	0.396
2	2	6.286	1.772	0	0.92	0	0.024
2	2	6.472	0.382	0	0.054	0.572	0.942
2	2	7.894	0.194	0.006	0.198	0.004	0.062
2	2	6.034	0.638	0.046	0.198	0.142	0.29
2	2	6.508	0.928	0.238	0.104	0.28	0.586
2	2	2.87	0.006	0	0	0.188	0.634
2	2	4.938	0.21	0.11	0.014	0.334	2.108
2	2	6.602	1.254	0	0.608	0.3	0.402
2	2	7.546	0.944	0.016	0.506	0.062	0.01
2	2	7.808	0.864	0.542	0.022	2.836	0.008
2	2	5.458	1.134	0.208	0.604	0.308	0.59
group	age
1= ASD	1= preschool
2= TD	2= adolescent
